# Supplementary material for: TRIB3 Modulates PPARγ-Mediated Growth Inhibition by Interfering with the MLL Complex in Breast Cancer Cells
Source: MDPI journal article supplement (doi:10.3390/ijms231810535), 2022-09-11

## SUPPLEMENTARY INFORMATION

### TRAIN Consortium members:

| Surname          | First Name    | Institution                                                        |
|------------------|---------------|--------------------------------------------------------------------|
| Bhutia           | Kunzangla     | Instituto de Investigacion Santaria, Hospital Clinico SanCarlos    |
| Brouard          | Sophie        | University of Nantes                                               |
| Barril           | Xavier        | University of Barcelona                                            |
| Carracedo        | Arkaitz       | Asociación Centro de Investigación Cooperativa en Biociencias      |
| Castillo Lluva   | Sonia         | Instituto de Investigacion Santaria, Hospital Clinico SanCarlos    |
| Danger           | Richard A.E.D | University of Nantes                                               |
| Day              | Jack          | Instituto de Investigacion Santaria, Hospital Clinico SanCarlos    |
| Deshmukh         | Sumeet R      | The University of Sheffield                                        |
| Feseha           | Yodit         | University of Nantes                                               |
| Francis          | Sheila        | The University of Sheffield                                        |
| Grzesik          | Dominika J    | William Harvey Research Institute, Queen Mary University, London   |
| Hernandez Quiles | Miguel        | Universitair Medisch Centrum Utrecht                               |
| Kalkhoven        | Eric          | Universitair Medisch Centrum Utrecht                               |
| Kiss-Toth        | Endre         | The University of Sheffield                                        |
| Linford          | Adam J        | Institute for Diabetes and Cancer (IDC), Helmholtz Zentrum München |

|                    |             |                                                                       |
|--------------------|-------------|-----------------------------------------------------------------------|
| Martinez Campesino | Laura       | The University of Sheffield                                           |
| Metherall          | Louise A    | William Harvey Research Institute, Queen<br>Mary University, London   |
| Morris             | Imogen      | Universitair Medisch Centrum Utrecht                                  |
| Niespolo           | Chiara      | The University of Sheffield                                           |
| Pellegata          | Natalia S   | Institute for Diabetes and Cancer (IDC),<br>Helmholtz Zentrum München |
| Ruiz Cantos        | Miriam      | William Harvey Research Institute, Queen<br>Mary University, London   |
| Salamanca Vilorio  | Juan        | University of Barcelona                                               |
| Satam              | Swapna S    | Institute for Diabetes and Cancer (IDC),<br>Helmholtz Zentrum München |
| Scheideler         | Marcel J.C. | Institute for Diabetes and Cancer (IDC),<br>Helmholtz Zentrum München |
| Shahrouzi          | Parastoo    | Asociación Centro de Investigación<br>Cooperativa en Biociencias      |
| Shologu            | Ziyanda     | Universidade da Beira Interior                                        |
| Shoulders          | Carol C     | William Harvey Research Institute, Queen<br>Mary University, London   |
| Sudbery            | Ian         | The University of Sheffield                                           |
| Socorro            | Silvia      | Universidade da Beira Interior                                        |

|                  |           |                                                                    |
|------------------|-----------|--------------------------------------------------------------------|
| Velasco          | Guillermo | Instituto de Investigacion Santaria, Hospital<br>Clinico SanCarlos |
| Villacanas Perez | Oscar     | MindtheByte Ltd                                                    |
| Wilson           | Heather   | The University of Sheffield                                        |

**Supplementary Table S1: Primers used for RT-qPCR**

| Gene name | Primer sequence (5' - 3')                               |
|-----------|---------------------------------------------------------|
| hTRIB3    | Fw: CTGAGTATCTCAGGTCCACGT<br>Rv: AGGTGGAGCATTTCTCGCGCTA |
| hPPARG1   | Fw: ATGGCATTATGAGACATCCC<br>Rv: CATAATGCCATCAGGTTTGGG   |
| 36B4      | Fw: GGAAGGTGTAATCCGTCTCCACAG<br>Rv: CGAGCGCGAGCATGTGT   |

Supplementary Table S2: Primers used for ChIP-RT-qPCR.

| Gene name    | Primer sequence (5' - 3')                               |
|--------------|---------------------------------------------------------|
| PPARG pair 1 | Fw: GGATGAGAGCTGGGGAGAAG<br>Rv: TCAGCCCAAGACCCCTTCA     |
| PPARG pair 2 | Fw: CTGAGGCAGGGTCATGGTC<br>Rv: AAGACCCCTTCACCCGGTC      |
| HSCB         | Fw: CACTCCCCCTTCAGCTCAAA<br>Rv: TGGGTGTTTGGTGGTTCGAA    |
| Neg          | Fw: GAGCCAGGGTTTCTCTGATTC<br>Rv: CCTCAGTGATCAGCCCTAAATG |

Supplementary Table S3: Gene enrichment analysis.

| Gene set                         | Direction | p-Value              |
|----------------------------------|-----------|----------------------|
| Cytoplasmatic ribosomal proteins | Down      | 8.42e <sup>-16</sup> |
| Apical junction                  | Up        | 0.0044               |
| Cell differentiation index       | Up        | 0.001                |
| Translation factors              | Down      | 0.001                |
| White fat cell differentiation   | Up        | 0.001                |
| Myc target genes                 | Down      | 1.19 e <sup>-7</sup> |
| Oxidative phosphorylation        | Down      | 0.000027             |
| Kras signaling                   | Up        | 0.0013               |
| Fatty acid metabolism            | Down      | 0.066                |

Supplementary figure s1

A

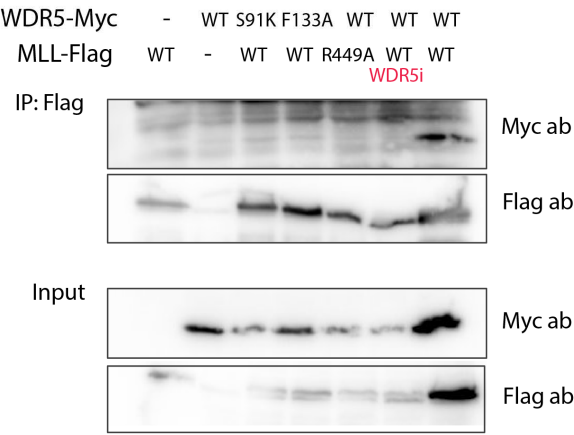

Supplement: s1 [file s1]
